# Supplementary material for: Multiparametric AFM reveals turgor-responsive net-like peptidoglycan architecture in live streptococci
Source: PubMed Central journal article supplement (PMC4458890; doi:10.1038/ncomms8193), 2015-05-28
Supplement: ncomms8193-s1.pdf [file ncomms8193-s1.pdf]

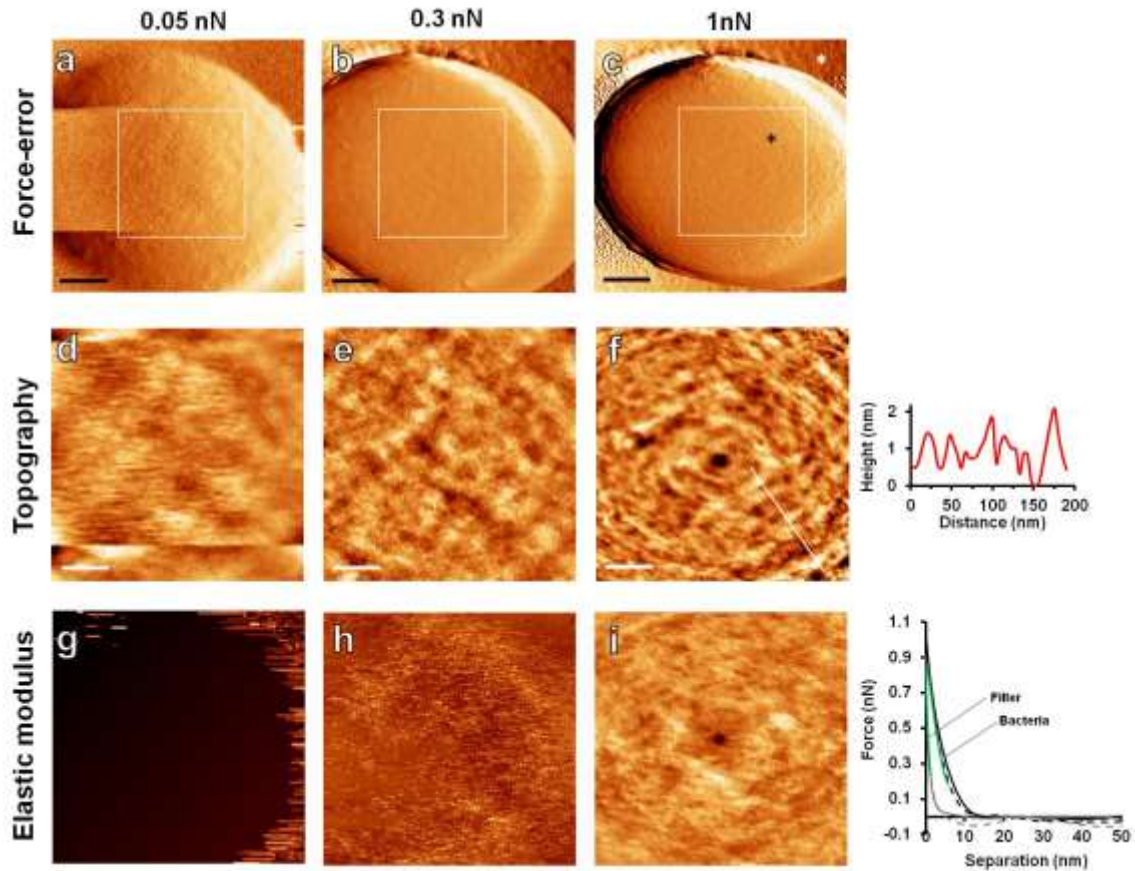

**Supplementary Figure 1. The influence of different peak-force scans on surface architecture.** (a-c) Peak-force error mode images of whole bacteria (scale bars, 200 nm). (d-f) Height mode images of the cell's top show a banded architecture only when a 1 nN imaging force is used (scale bars, 95 nm; height scale, 4.2 nm; profile of bands from f is at the right). (g-i) Elastic modulus images are sensitive to surface properties only when a 1 nN force is used (color scale, 0-4 MPa;). Force curves recorded from the cell (black) and filter (gray) from spots marked in c (approach is full line and retraction is dashed line).

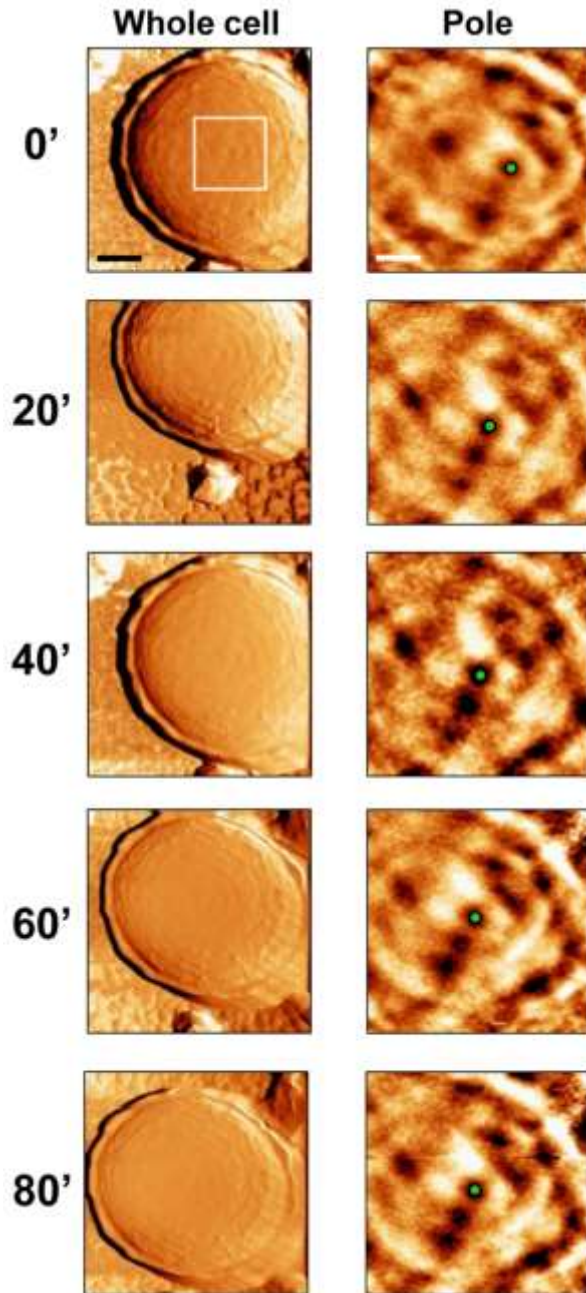

**Supplementary Figure 2. Scanning bacteria using 1 nN force does not alter the surface topography during multiple scanning cycles.** (a) Representative force-error images from an experiment in which single cells were scanned repeatedly in ultrapure water (scale bar, 200 nm; 1,024 pixels/ $\mu\text{m}$ ; 1 Hz rate). (b) High-magnification height mode images show the surface topography does not significantly change with time (scale bar, 100 nm; height, 4.1 nm; green dot marks the center of the pole).

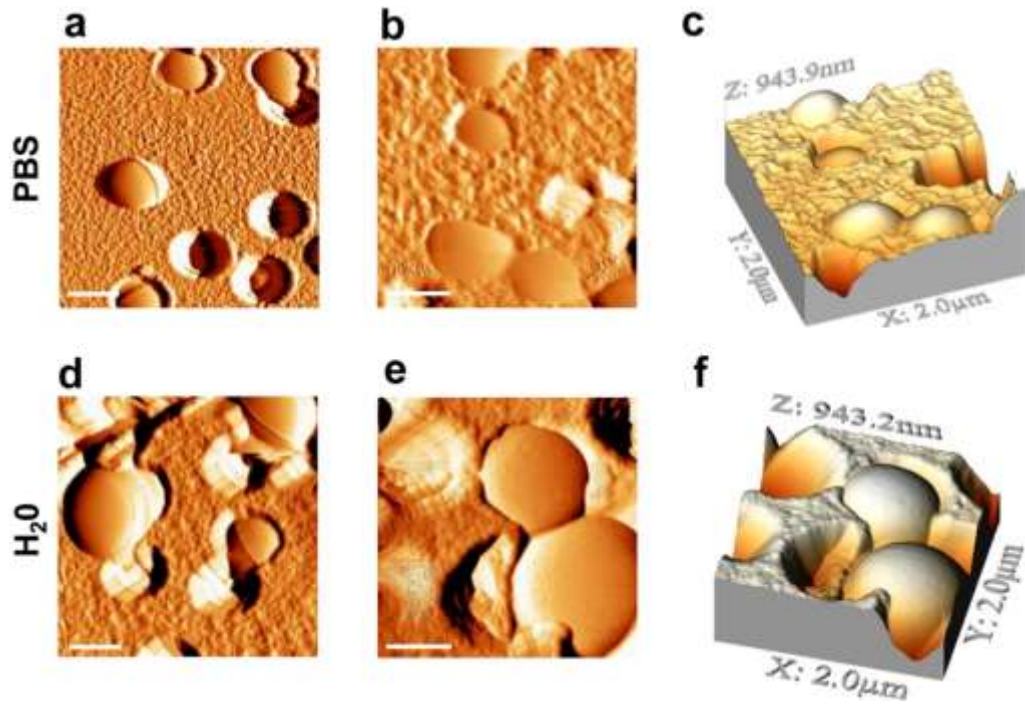

**Supplementary Figure 3. Bacteria imaged in ultrapure water are significantly swollen.** (a, b) Representative force-error image of pore-trapped GBS imaged in PBS (scale bars, 600 nm and 500 nm, respectively). (c) 3D-representation of (b). (d, e) Representative force-error image in ultrapure water (scale bars, 600 nm and 500 nm, respectively). (f) 3D-representation of (e).

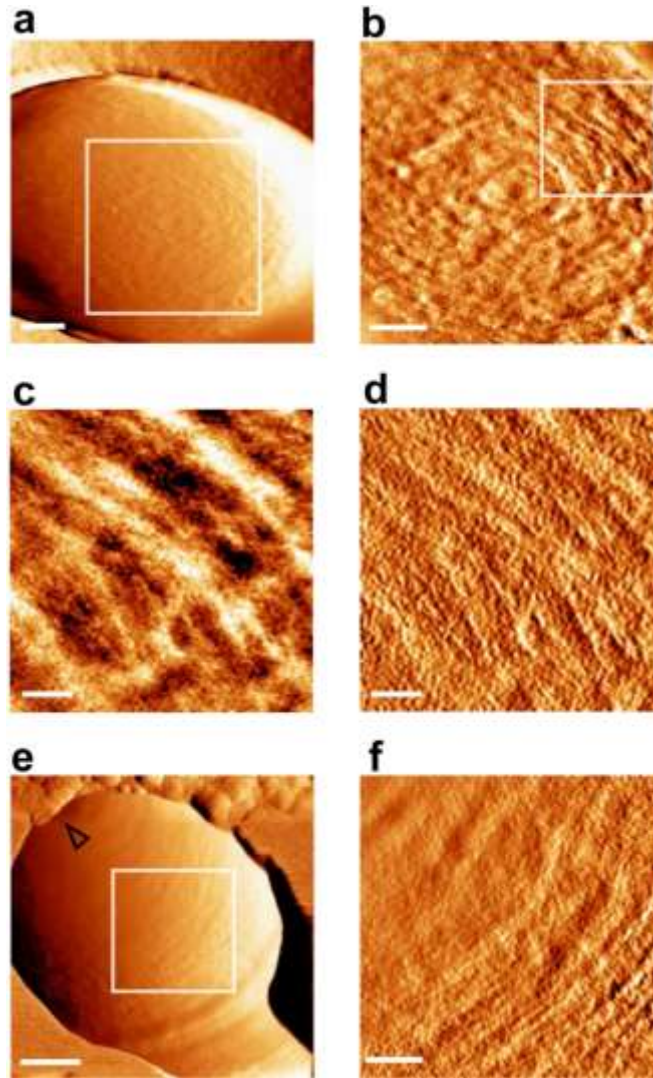

**Supplementary Figure 4. Single strands in stationary *srtA* mutant.** (a, e) Representative force-error image of stationary *srtA* mutant (scale bars, 150 nm and 200 nm, respectively). (b) Magnified force-error image of the pole region from a (scale bar, 75 nm). (c, d) Height and corresponding force-error images, respectively (scale bar, 25 nm; height, 1.3 nm). (f) Magnified force-error image of the side-wall region from e (scale bar, 25 nm).

Supplementary Table 1. Bacterial strains used in this study

| Strains              | Relevant genotype and characteristics <sup>a</sup>                  | Source |
|----------------------|---------------------------------------------------------------------|--------|
| <i>S. agalactiae</i> |                                                                     |        |
| NEM316               | WT strain, serotype III, ST23                                       | 1      |
| <i>lgt-lsp</i>       | NEM316 <i>lgt</i> Δ <i>aphA-3</i> <i>lsp</i> Δ <i>aad6</i> ; Km, Sm | 2      |
| <i>cpsD</i>          | NEM316 <i>cpsD</i> Δ <i>aphA-3</i> ; Km                             | 3      |
| <i>srtA</i>          | NEM316 <i>srtA</i> Δ <i>aphA-3</i> ; Km                             | 4      |

<sup>a</sup>*aphA-3*, 3'-aminoglycoside phosphotransferase type III; *aad6*, 6-adenylyltransferase; Km and Sm, enzymatic resistance to kanamycin and streptomycin, respectively; Str, streptomycin-resistant mutant.

## References

1. Glaser, P. et al. Genome sequence of *Streptococcus agalactiae*, a pathogen causing invasive neonatal disease. *Mol Microbiol* **45**, 1499-1513 (2002).
2. Henneke, P. et al. Lipoproteins are critical TLR2 activating toxins in group B streptococcal sepsis. *J Immunol* **180**, 6149-6158 (2008).
3. Poyart, C., Lamy, M.C., Boumaila, C., Fiedler, F. & Trieu-Cuot, P. Regulation of D-alanyl-lipoteichoic acid biosynthesis in *Streptococcus agalactiae* involves a novel two-component regulatory system. *J Bacteriol* **183**, 6324-6334 (2001).
4. Lalioui, L. et al. The SrtA Sortase of *Streptococcus agalactiae* is required for cell wall anchoring of proteins containing the LPXTG motif, for adhesion to epithelial cells, and for colonization of the mouse intestine. *Infect Immun* **73**, 3342-3350 (2005).
